# Supplementary material for: Waste dry cell derived photo-reduced graphene oxide and polyoxometalate composite for solid-state supercapacitor applications
Source: Royal Society of Chemistry journal article supplement (doi:10.1039/d3cp01872e), 2023-01-01
Supplement: d3cp01872e3.pdf [file d3cp01872e3.pdf]

## Supporting Information

### Waste dry cells derived photo-reduced graphene oxide and polyoxometalate composite for solid-state supercapacitor applications

Sukanya Maity<sup>a,†</sup>, Bhimaraya R Biradar<sup>a</sup>, Saurabh Srivastava<sup>b</sup>, Pranay R. Chandewar<sup>c</sup>, Debaprasad Shee<sup>c</sup>,  
Partha Pratim Das<sup>a,\*</sup>, Sib Sankar Mal<sup>b,\*</sup>

<sup>a</sup>Low Dimensional Physics Laboratory, Department of Physics, National Institute of Technology Karnataka, Surathkal 5750525, India

<sup>b</sup>Materials and Catalysis Laboratory, Department of Chemistry, National Institute of Technology Karnataka, Surathkal 5750525, India

<sup>c</sup>Department of Chemical Engineering, Indian Institute of Technology Hyderabad, Kandi, Sangareddy 502284, Telangana, India

<sup>†</sup>Current Address: Department of Physics, Chemistry and Biology (IFM), Linköping University, 58183 Linköping, Sweden

1. The specific capacitance was calculated from the cyclic voltammetry by the following equation,

$$C = \frac{\int_{V_1}^{V_2} i(V)dV}{v(V_2 - V_1)} \dots\dots (S1)$$

2. Capacitances with energy and power density from charge-discharge were calculated using the following equations for asymmetric arrangements:

$$C = \frac{\int_{V_i}^{V_f} iVdt}{\int_{V_i}^{V_f} VdV} = \frac{2i_m \int_{V_i}^{V_f} Vdt}{V^2 \left\{ \frac{V_f}{V_i} \right\}}$$

Galvanostatic capacitance: F/g ..... (S1)

$$C = \frac{i(\Delta t * \Delta V)}{n(\Delta V)^2} = \frac{i(\Delta t)}{m(\Delta V)} = \frac{I(\Delta t)}{\Delta V} \text{ F/g} \dots\dots\dots (S2)$$

$$\text{Energy density: } E = 0.5 * C * \Delta V^2 \text{ Wh/kg} \dots\dots\dots (S3)$$

$$\text{Power density: } P = \frac{E}{\Delta t} * 3600 \text{ W/kg} \dots\dots\dots (S4)$$

where  $I$ ,  $m$ ,  $t$ , and  $\Delta V$  are discharge current, the mass of single electrode, discharge time, and potential window, respectively.

3. The total impedance is given by,

$$Z(\omega) = Z'(\omega) + jZ''(\omega), \dots\dots\dots(S5),$$

where  $\omega = 2\pi f$ ,  $f$  is the frequency of the input ac signal.

The Total capacitance is given as [34],

$$c(\omega) = c'(\omega) - jc''(\omega) \dots\dots\dots (S6),$$

where real the part of the capacitance  $c'(\omega) = \frac{Z''(\omega)}{\omega|Z(\omega)|^2} \dots\dots\dots (S7)$  and

the imaginary part of the capacitance  $c''(\omega) = \frac{Z'(\omega)}{\omega|Z(\omega)|^2} \dots\dots\dots (S8).$

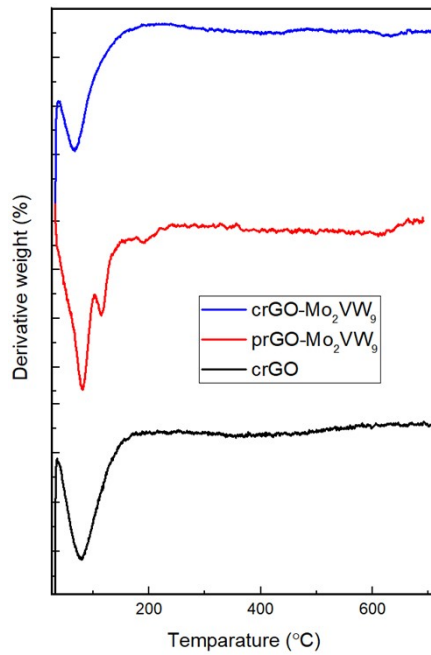

**Fig. S1** DTA spectra of crGO, prGO-Mo<sub>2</sub>VW<sub>9</sub>, and crGO-Mo<sub>2</sub>VW<sub>9</sub> nanocomposites.

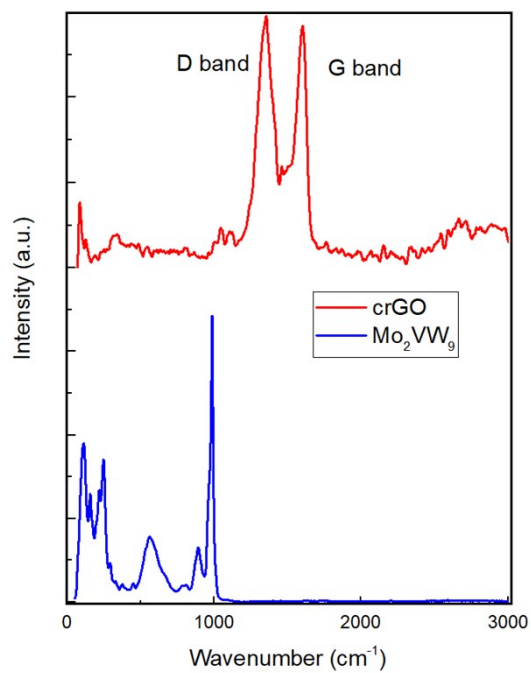

Fig. S2 Raman spectra of crGO and Mo<sub>2</sub>VW<sub>9</sub>.

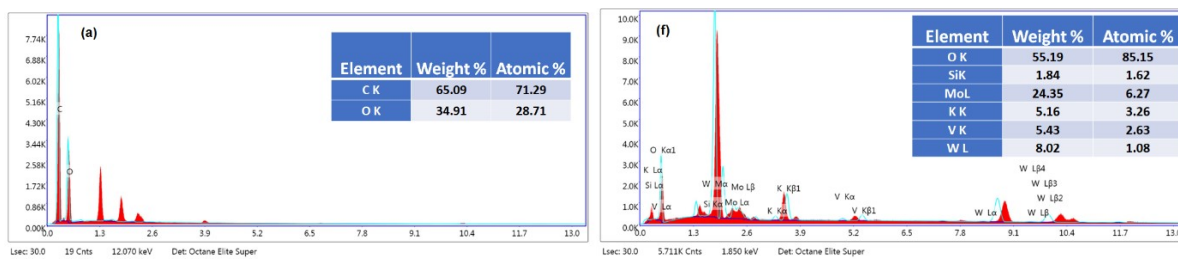

Fig. S3 EDS spectra of (a) crGO and (b) Mo<sub>2</sub>VW<sub>9</sub>.

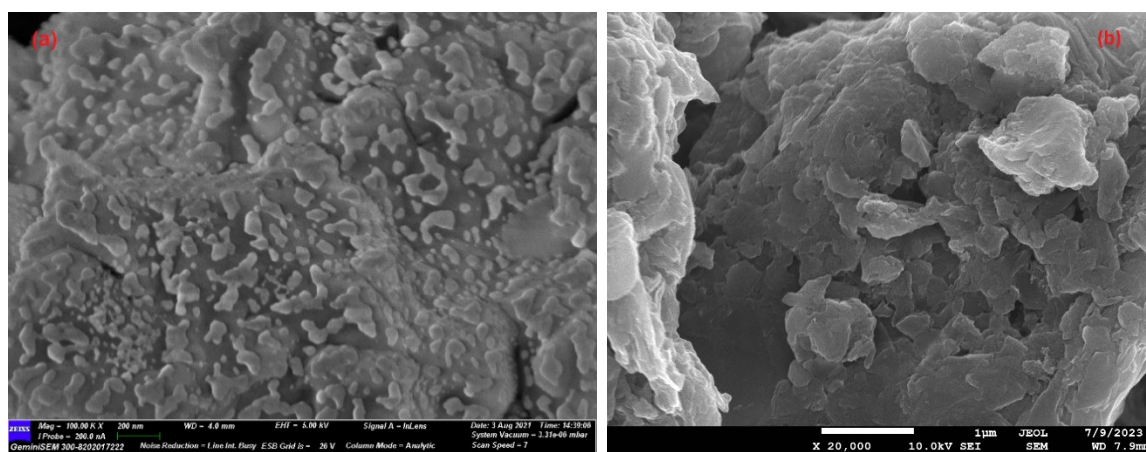

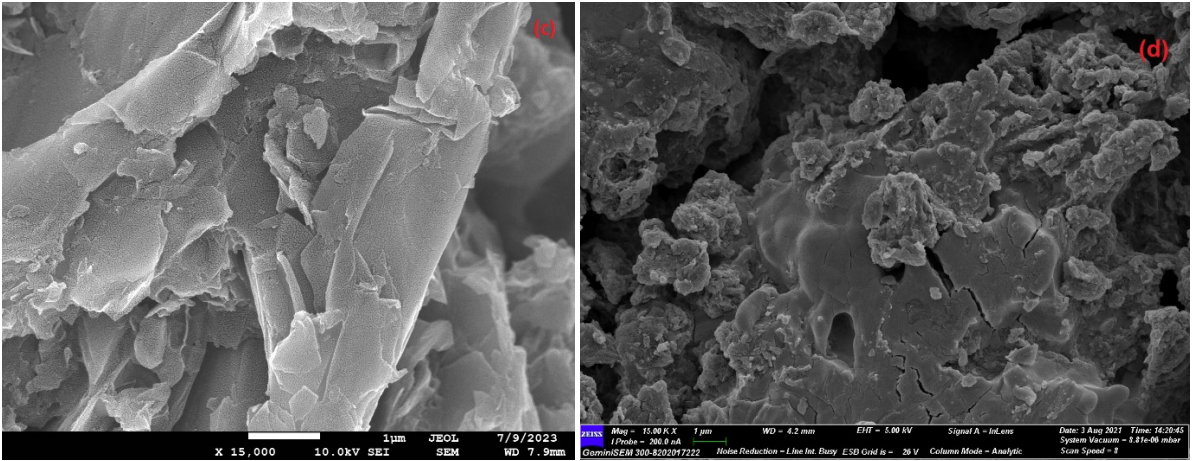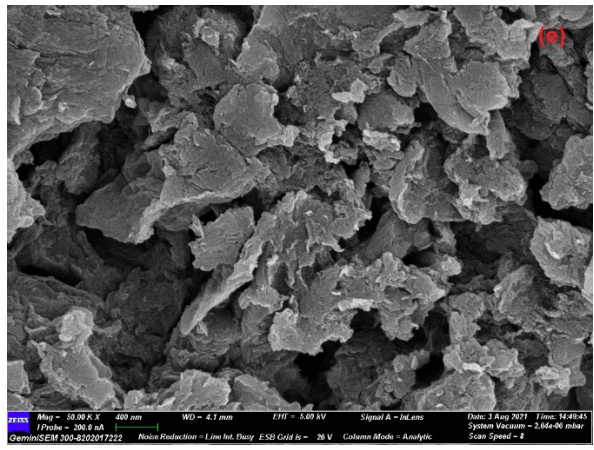

Fig. S4 FESEM micrograph at different magnification for (a-b) prGO-Mo<sub>2</sub>VW<sub>9</sub>, (c-d) crGO-Mo<sub>2</sub>VW<sub>9</sub> nanocomposites, and (e) bare crGO.

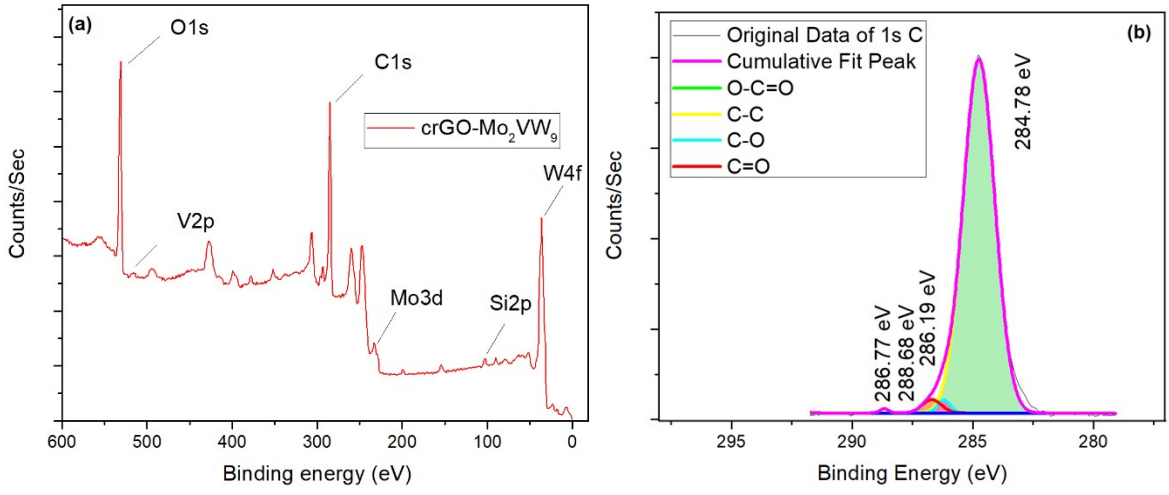

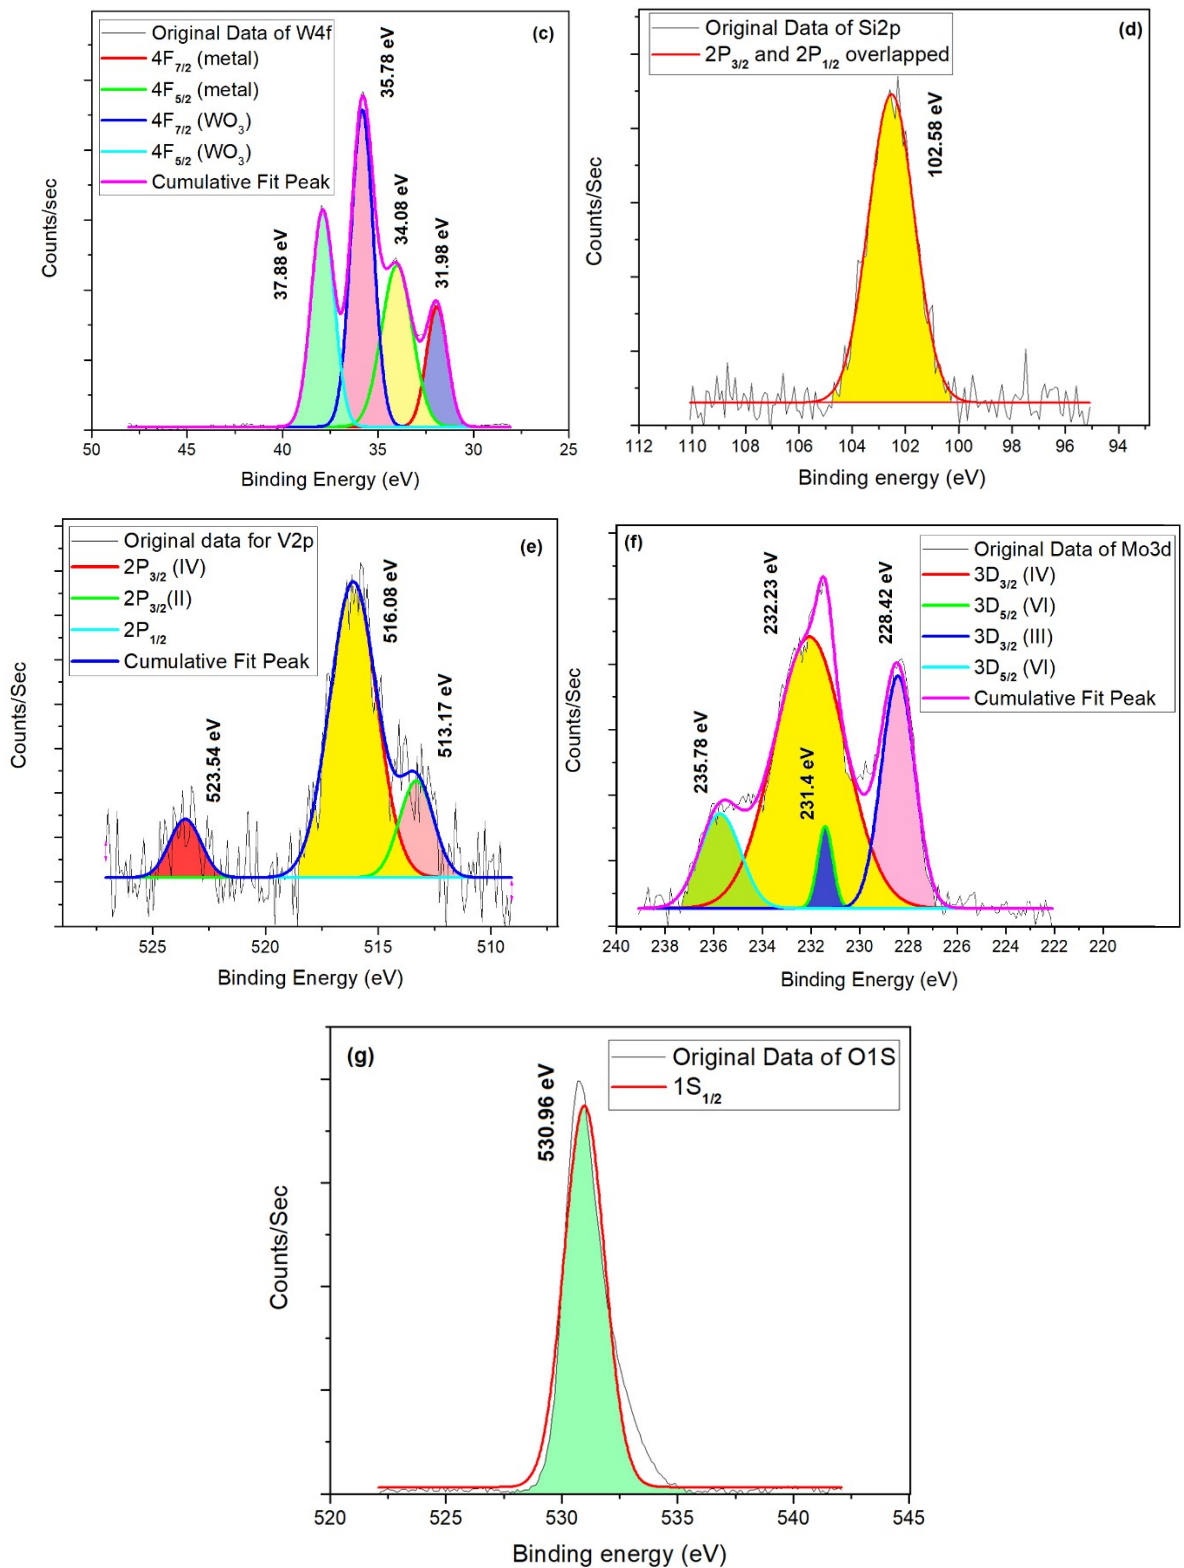

**Fig. S5** XPS spectra of (a) overall survey, (b) C 1s, (c) W 4f, (d) Si 2p, (e) V 2p, (f) Mo 3d, and (g) O 1s for crGO-Mo<sub>2</sub>VW<sub>9</sub> nanocomposite.

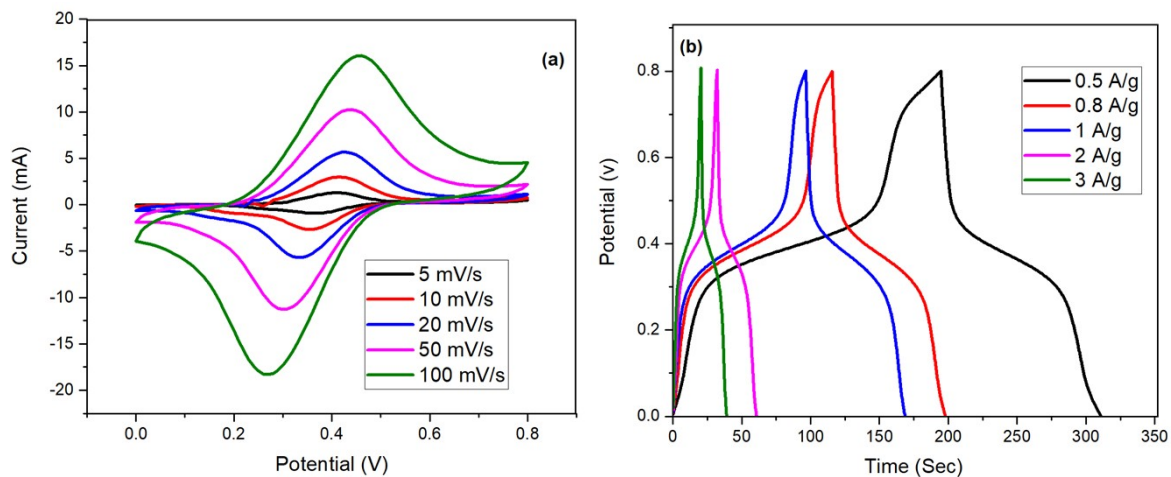

**Fig. S6** (a) CV and (b) GCD response of pristine  $\text{Mo}_2\text{VW}_9$ .

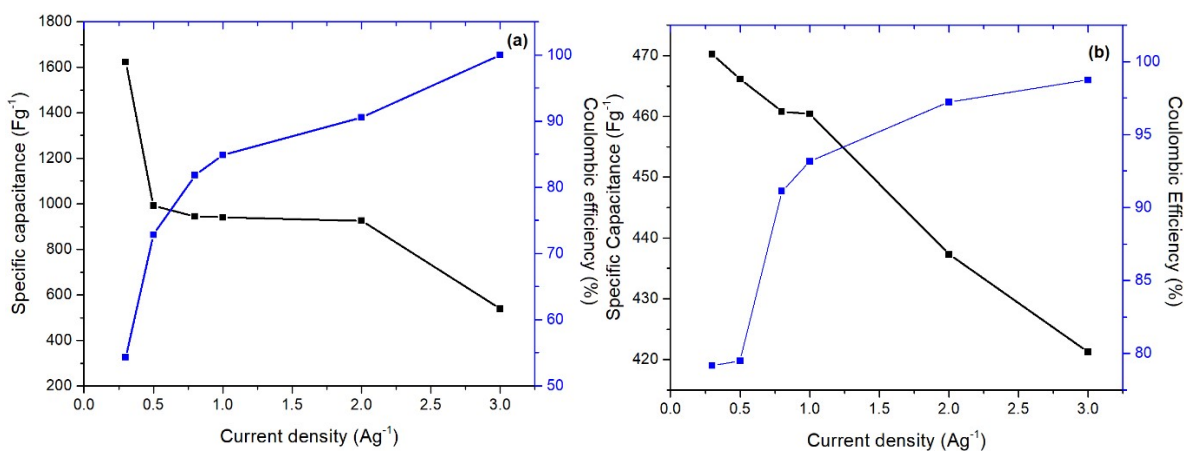

**Fig. S7** Coulombic efficiency and specific capacitance variation of (a) prGO- $\text{Mo}_2\text{VW}_9$  and (b) crGO- $\text{Mo}_2\text{VW}_9$  nanocomposites.

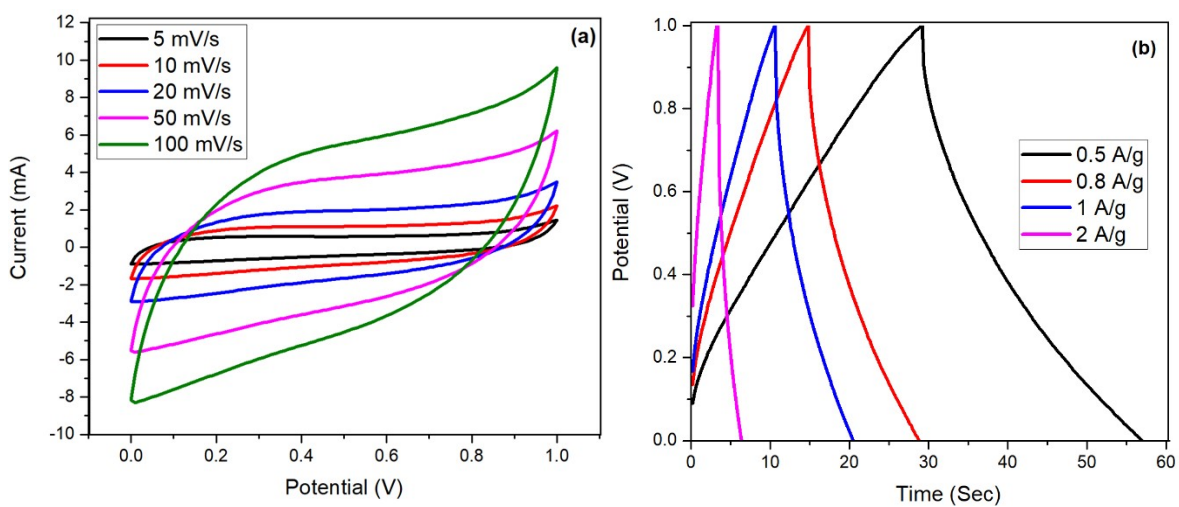

**Fig. S8** (a) CV and (b) GCD response of pristine crGO.

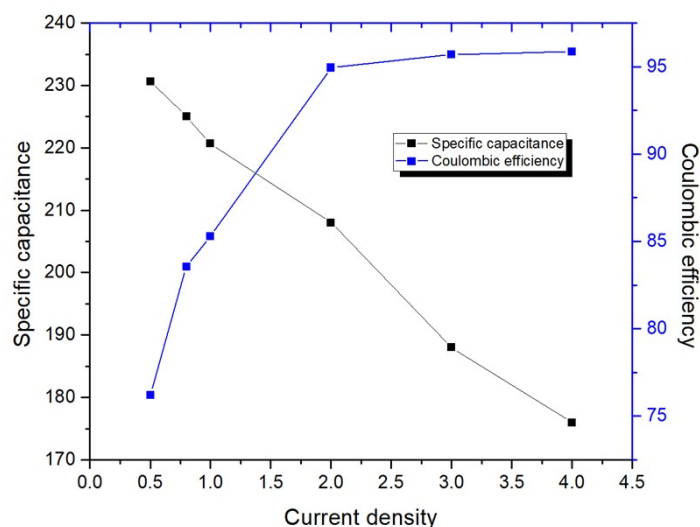

**Fig. S9** Coulombic efficiency and specific capacitance variation of the crGO//crGO-Mo<sub>2</sub>VW<sub>9</sub> cell.

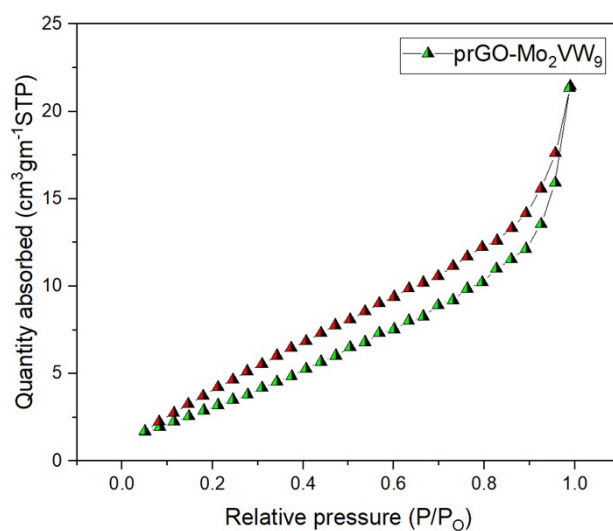

**Fig. S10** Repeated BET isotherm of prGO/Mo<sub>2</sub>VW<sub>9</sub> nanocomposite.

**Table S1.** Specific capacitance and energy of prGO-Mo<sub>2</sub>VW<sub>9</sub> nanocomposite at different scan rates from CV:

| Scan rate (mV/s) | Capacitance (F/g) | Energy density (Wh/kg) |
|------------------|-------------------|------------------------|
| 5                | 97.0361           | 10.9165                |
| 10               | 98.1652           | 11.0435                |
| 20               | 92.1861           | 10.3709                |
| 50               | 78.9094           | 8.8773                 |
| 100              | 65.4347           | 7.3624                 |

**Table S2.** Specific capacitance, energy, and power of prGO-Mo<sub>2</sub>VW<sub>9</sub> nanocomposite at different current densities from GCD:

| Current density (A/g) | Capacitance (F/g) | Energy density (Wh/kg) | Power density (W/kg) | Coulombic efficiency |
|-----------------------|-------------------|------------------------|----------------------|----------------------|
|-----------------------|-------------------|------------------------|----------------------|----------------------|

|     |        |       |          |       |
|-----|--------|-------|----------|-------|
| 0.3 | 1622.7 | 45.63 | 1585.59  | 54.29 |
| 0.5 | 992.29 | 27.91 | 2098.28  | 72.84 |
| 0.8 | 944.55 | 26.56 | 3061.17  | 81.81 |
| 1   | 940.86 | 26.46 | 3721.06  | 84.90 |
| 2   | 925.47 | 26.02 | 7135.52  | 90.54 |
| 3   | 539.40 | 15.17 | 10113.75 | 100   |

**Table S3.** The electrical component values of the equivalent series circuit for prGO-Mo<sub>2</sub>VW<sub>9</sub> nanocomposite

| Equivalent Series Resistance (R <sub>s</sub> ) | Circuit resistance (R <sub>ct</sub> ) | Cell Capacitance (C <sub>T</sub> ) | Knee frequency (f <sub>k</sub> ) | Time constant (τ) |
|------------------------------------------------|---------------------------------------|------------------------------------|----------------------------------|-------------------|
| 0.76 Ω                                         | 3.02 Ω                                | 2.69 mF                            | 15.85 Hz                         | 16.2 ms           |

**Table S4.** Specific capacitance and energy of crGO-Mo<sub>2</sub>VW<sub>9</sub> nanocomposite at different scan rates from CV:

| Scan rate (mV/s) | Capacitance (F/g) | Energy density (Wh/kg) |
|------------------|-------------------|------------------------|
| 5                | 252.99            | 28.46                  |
| 10               | 315.17            | 34.4577                |
| 20               | 304.093           | 34.2104                |
| 50               | 260.52            | 29.3094                |
| 100              | 189.87            | 21.36                  |

**Table S5.** Specific capacitance, energy, and power of crGO-Mo<sub>2</sub>VW<sub>9</sub> nanocomposite at different current densities from GCD:

| Current density (A/g) | Capacitance (F/g) | Energy density (Wh/kg) | Power density (W/kg) | Coulombic efficiency |
|-----------------------|-------------------|------------------------|----------------------|----------------------|
| 0.3                   | 470.2             | 52.87                  | 540                  | 79.16                |
| 0.5                   | 466.1             | 52.44                  | 540.71               | 79.50                |
| 0.8                   | 460.8             | 51.84                  | 1440                 | 91.13                |
| 1                     | 460.4             | 51.79                  | 1800                 | 93.16                |
| 2                     | 437.3             | 49.20                  | 3600                 | 97.23                |
| 3                     | 421.3             | 47.39                  | 5400                 | 98.75                |

**Table S6.** The electrical component values of the equivalent series circuit for crGO-Mo<sub>2</sub>VW<sub>9</sub> nanocomposite

| Equivalent Series Resistance (R <sub>s</sub> ) | Circuit resistance (R <sub>ct</sub> ) | Cell Capacitance (C <sub>T</sub> ) | Knee frequency (f <sub>k</sub> ) | Time constant (τ) |
|------------------------------------------------|---------------------------------------|------------------------------------|----------------------------------|-------------------|
|------------------------------------------------|---------------------------------------|------------------------------------|----------------------------------|-------------------|



|               |               |       |         |          |
|---------------|---------------|-------|---------|----------|
| 0.82 $\Omega$ | 14.1 $\Omega$ | 60 mF | 0.16 Hz | 15.92 ms |
|---------------|---------------|-------|---------|----------|

**Table S7.** Specific capacitance, energy, and power of crGO//crGO-Mo<sub>2</sub>VW<sub>9</sub> nanocomposite at a different current density

from GCD:

| Current density (A/g) | Capacitance (F/g) | Energy density (Wh/kg) | Power density (W/kg) | Coulombic efficiency |
|-----------------------|-------------------|------------------------|----------------------|----------------------|
| 0.5                   | 230.66            | 46.13                  | 1194.70              | 76.21                |
| 0.8                   | 225.06            | 45.01                  | 1929.08              | 83.56                |
| 1                     | 220.66            | 44.13                  | 2400.00              | 85.30                |
| 2                     | 208               | 41.60                  | 4800.00              | 94.94                |
| 3                     | 188               | 37.6                   | 7200                 | 95.70                |
| 4                     | 176               | 35.2                   | 9600                 | 95.85                |

**Table S8.** The electrical component values of the equivalent series circuit for crGO-Mo<sub>2</sub>VW<sub>9</sub> nanocomposite

| Equivalent Series Resistance (R <sub>s</sub> ) | Circuit resistance (R <sub>ct</sub> ) | Cell Capacitance (C <sub>T</sub> ) | Knee frequency (f <sub>k</sub> ) | Time constant ( $\tau$ ) |
|------------------------------------------------|---------------------------------------|------------------------------------|----------------------------------|--------------------------|
| 0.468 $\Omega$                                 | 3.44 $\Omega$                         | 232.4 mF                           | 0.1 Hz                           | 1.6 ms                   |
